# Supplementary material for: Enhanced hydroxyl bridge-mediated microalgal lipid conversion via mixed-valence Zr/Ce-MOF-808 catalysts at reduced temperatures
Source: Royal Society of Chemistry journal article supplement (doi:10.1039/d4se00647j), 2024-01-01
Supplement: d4se00647j1.pdf [file d4se00647j1.pdf]

## Supplementary Material

### **Enhanced Hydroxyl Bridge-Mediated Microalgal Lipid Conversion via Mixed-Valence Zr/Ce-MOF-808 Catalysts at Reduced Temperatures**

**Lei Qian<sup>1</sup>, Jun Cheng<sup>2,1\*</sup>, Kai Xin<sup>1</sup>, Hao Guo<sup>1</sup>, Yuxiang Mao<sup>1</sup>, Jiacan Tu<sup>3</sup>, Weijuan Yang<sup>1</sup>**

*1 State Key Laboratory of Clean Energy Utilization, Zhejiang University, Hangzhou 310027, China*

*2 Key Laboratory of Low-grade Energy Utilization Technologies and Systems of Ministry of Education, Chongqing University, Chongqing 400044, China*

*3 Zhejiang Lanyou Energy Co. Ltd, Zhoushan 316013, China*

---

\* Corresponding author: Prof. Dr. Jun Cheng, State Key Laboratory of Clean Energy Utilization, Zhejiang University, Hangzhou 310027, China. Tel.: +86 571 87952889; fax: +86 571 87951616. E-mail: juncheng@zju.edu.cn

---

## S1. Materials

The marine microalgae *Nannochloropsis oceanica* were provided by Yantai Hearol Biotechnology Co., Ltd. (Shandong, China). Zirconium oxychloride octahydrate (99.9%,  $\text{ZrOCl}_2 \cdot 8\text{H}_2\text{O}$ ), cerium(III) chloride heptahydrate (99%,  $\text{CeCl}_3 \cdot 7\text{H}_2\text{O}$ ), and benzene-1,3,5-tricarboxylic acid (99%,  $\text{H}_3\text{BTC}$ ) were purchased from Macklin Biochemical Co., Ltd. (Shanghai, China). *N,N*-dimethyl formamide (99%, DMF), formic acid (99%), methanol (99.9%), chloroform (99%), sulfuric acid (96%), and *n*-hexane (98%) were obtained from Aladdin Industrial Inc. (Shanghai, China). All chemicals were of reagent-grade quality and used as received without any further purification.

## S2. Analytical techniques

X-ray diffraction (XRD) was conducted on an X'Pert<sup>3</sup> PRO diffractometer (Malvern Panalytical, UK, the Netherlands) operated at 40 kV with Cu  $K\alpha$  radiation using a scanning speed of  $2^\circ \text{ min}^{-1}$ . Scanning electron microscopy (SEM) and energy-dispersive X-ray spectroscopy (EDS) were performed on a SU8010 instrument (Hitachi, Japan) equipped with an EDS system. Thermogravimetric analysis (TGA) was conducted with a Q500 TGA instrument (TA Instruments, USA) under nitrogen atmosphere. Fourier transform infrared (FT-IR) spectra were collected using a Nicolet iS5 FT-IR spectrometer (Thermo Fisher Scientific, USA) for additional studies of the composition and chemical valence of the catalysts. X-ray photoelectron spectroscopy (XPS) was performed on an Escalab 250XI instrument (Thermo Fisher Scientific, USA) using Al  $K\alpha$  radiation. Nitrogen adsorption-desorption experiments were performed with a Quantachrome Autosorb-iQ3 instrument (Micromeritics, USA) at  $-196^\circ \text{C}$  to determine Brunauer–Emmett–Teller (BET) surface areas and pore size distributions. Prior to the measurement, all samples of about 200 mg were dried at  $150^\circ \text{C}$  under vacuum. The acid and base properties of catalysts were determined by temperature-programmed desorption of ammonia ( $\text{NH}_3$ -TPD) and carbon dioxide ( $\text{CO}_2$ -TPD), outlined briefly as follows. First, the samples (60 mg) were pretreated at  $200^\circ \text{C}$  under helium atmosphere for 2 h, then subjected to a helium gas flow ( $40 \text{ mL min}^{-1}$ ) for 2 h, and cooled to  $50^\circ \text{C}$ . Adsorption of  $\text{NH}_3$  or  $\text{CO}_2$  ( $40 \text{ mL min}^{-1}$ ) was performed at  $50^\circ \text{C}$  for 1 h, which was followed by desorption from room temperature to  $800^\circ \text{C}$  at a heating rate of  $10^\circ \text{C min}^{-1}$  under helium atmosphere. The bonding mode of methanol on Zr/Ce(1:1)-MOF-808 was probed by

---

*in situ* IR techniques (Fig. 8). The samples were immersed in methanol and dried overnight at 50 °C in a vacuum oven prior to testing. During testing, samples were activated at 50 °C under a helium atmosphere until the spectra were stable. IR spectra were recorded in the range of 550-4000 cm<sup>-1</sup> at intervals of 10 °C during ramping up from room temperature to 200 °C at 2 °C min<sup>-1</sup> after holding for 5 min at each temperature before scanning. The composition of the catalyst was determined by gas analysis during programmed temperature pyrolysis. Briefly, a 60 mg sample was weighed in a reaction tube and purged under a helium gas flow (40 mL min<sup>-1</sup>), heated to 200 °C for drying and pretreatment, then cooled to 50 °C, and finally heated to 800 °C at a rate of 10 °C min<sup>-1</sup>, and the pyrolysis gas was analyzed by mass spectrometry (MS). Inductively coupled plasma optical emission spectroscopy (ICP-OES) was performed using a PerkinElmer Optima 5300 DV instrument.

### **S3. FAME production**

#### **Optimized Bligh and Dyer protocol**

Briefly, 100 mg of dried microalgal biomass was fully ground and extracted with a mixture of chloroform (3 mL) and methanol (5 mL). After ultrasonic treatment for 3 min and centrifugation (8000 r·min<sup>-1</sup>, 3 min), the chloroform phase containing microalgal lipids was isolated, transferred to a glass bottle, and kept at 60 °C for 24 h to evaporate the solvent and obtain microalgal oil.

The relative contents of fatty acids in the extracted microalgal oil are C16:0 (21.9%), C16:1 (1.7%), C18:0 (3.3%), C18:1 (18.2%), and C18:2 (54.9%). The water content is 1.2%, the unsaponifiable matter content is 5.67%, and the acid value is 11.34 mg KOH/g lipid.

#### **One-step conversion method**

The microalgal lipids were mixed with methanol (2 mL) and transferred into a 5-mL autoclave. After adding the catalyst, the autoclave was heated to 160 °C and kept at this temperature for 120 min. The reactor was cooled to room temperature, and the FAME reaction mixture was extracted with a mixture of 6 ml *n*-hexane and 4 ml deionized water by shaking for 3 min. Then, the resulting liquid was centrifuged (8000 r min<sup>-1</sup>, 3 min). The phases were separated, and the FAME-containing *n*-hexane layer was transferred to a glass bottle and kept in an oven at 60 °C overnight to evaporate the solvent. The catalyst was separated from the water phase and

---

recovered for the next reaction cycle. The effects of reaction temperature (60, 70, 80, 90, 100, 120, 140, 160, 180, and 200 °C), reaction time (30, 60, 90, 120, 150, and 180 min), and catalyst concentration (1, 2, 3, 5, and 7 wt.%) on the conversion efficiency of Zr/Ce(1:1)-MOF-808 catalyst were investigated by this method.

### **Two-step method**

The lipids were saponified with 4 ml of a saturated methanolic sodium hydroxide solution at 60 °C for 30 min and then methanolated with 8 ml methanol containing 5% H<sub>2</sub>SO<sub>4</sub> at 90 °C for 60 min. FAME was extracted from the product with *n*-hexane, and the yield and composition of FAME were determined by gas chromatography with a 7890A instrument (Agilent, USA).

Catalytic efficiency was calculated according to

$$\text{Catalytic efficiency} = \frac{\text{mass of FAME produced by catalyst (mg)}}{\text{mass of total lipid (mg)}}$$

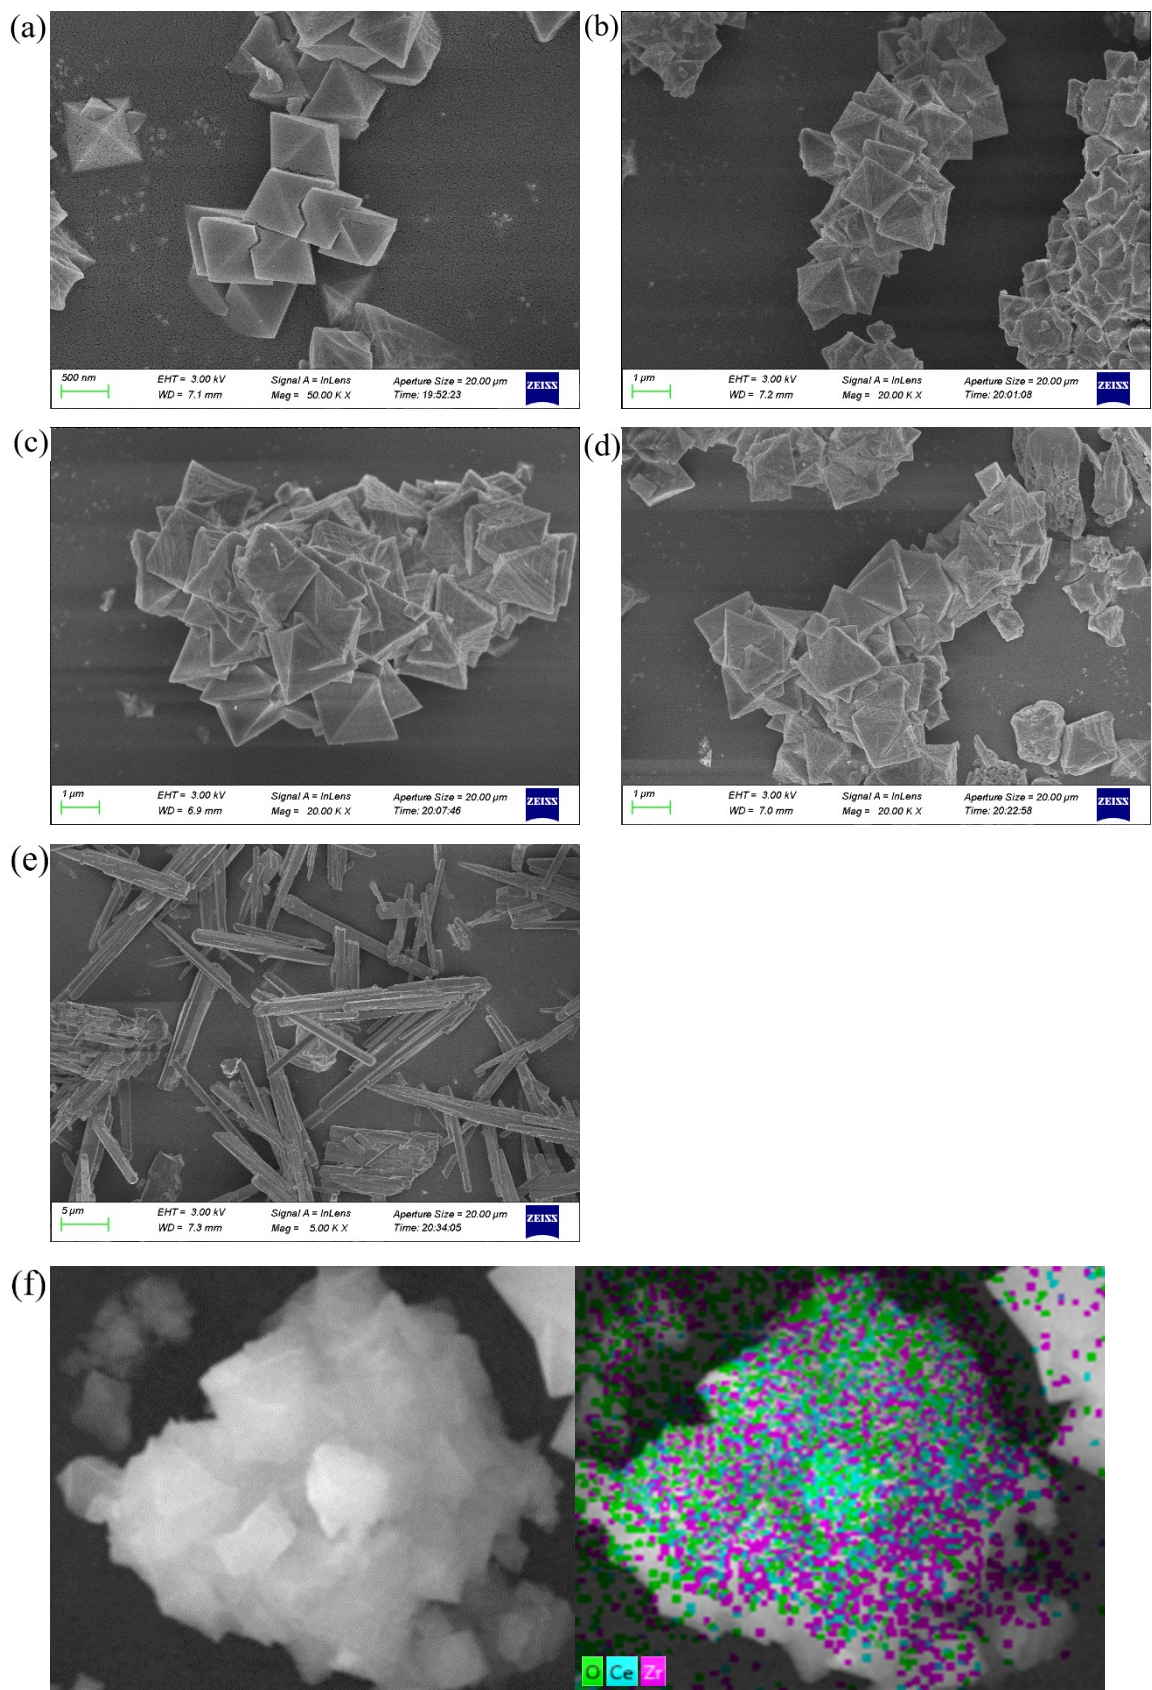

**Fig.S1 SEM images of (a) MOF-808 (b) Zr/Ce(2:1)-MOF-808 (c) Zr/Ce(1:1)-MOF-808 (d) Zr/Ce(1:2)-MOF-808 (e) Ce(III)-MOF-808 (f) EDS images of Zr/Ce(1:1)-MOF-808**

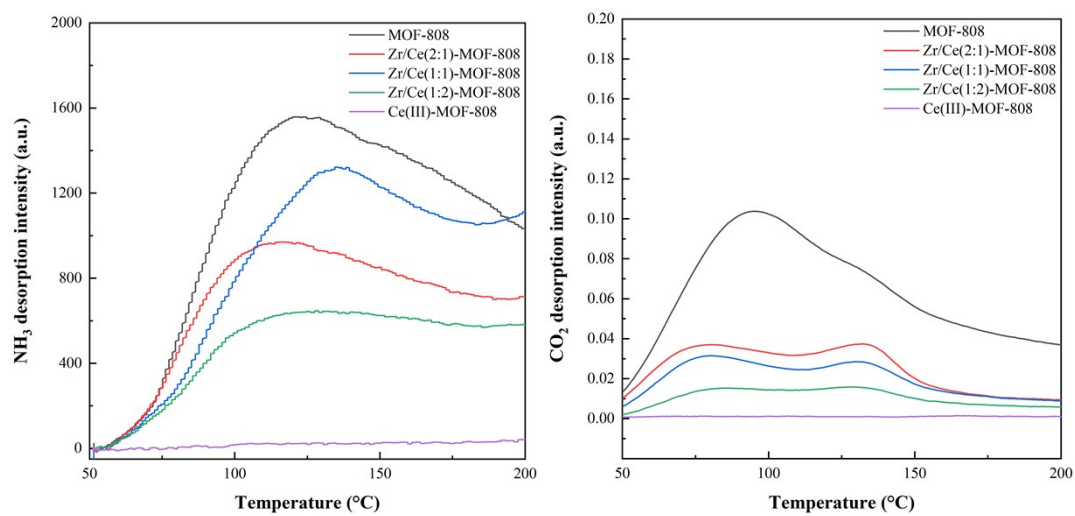

**Fig. S2 (a) NH<sub>3</sub>-TPD and (b) CO<sub>2</sub>-TPD profiles of catalysts**

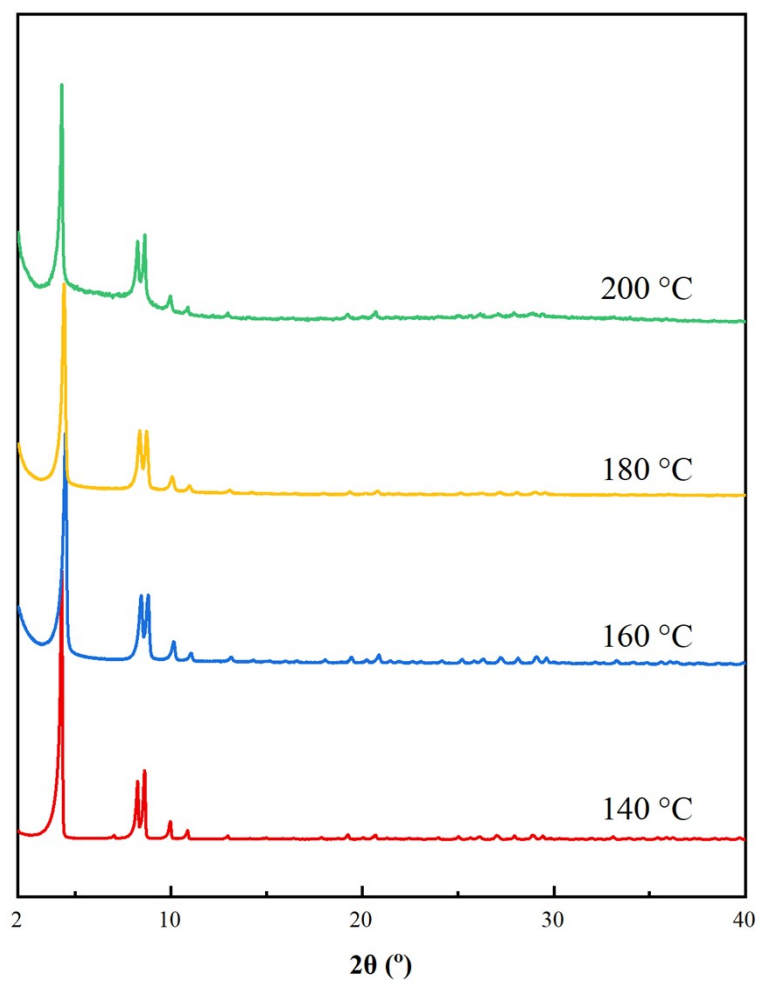

**Fig. S3 XRD analysis of Zr/Ce(1:1)-MOF-808 catalyst post-reaction at a catalyst loading of 2 wt.% and a reaction time of 2 hours**

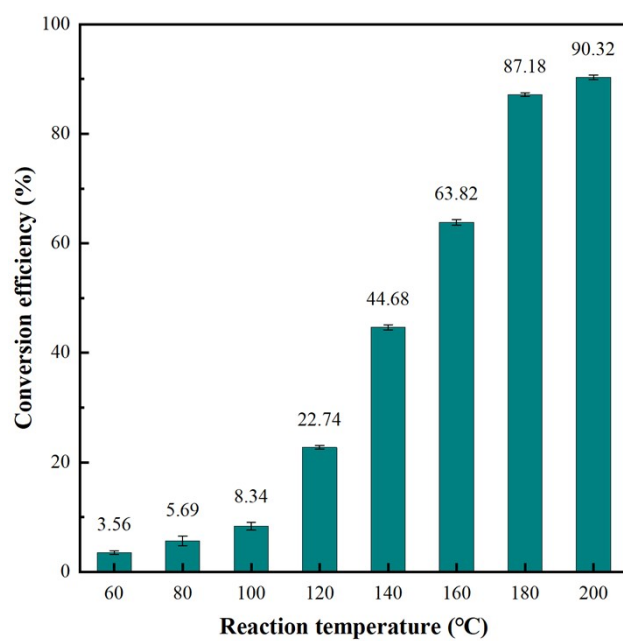

**Fig. S4 Conversion efficiency with temperature for the catalyst MOF-808 at a catalyst loading of 2 wt.% and a reaction time of 2 hours**



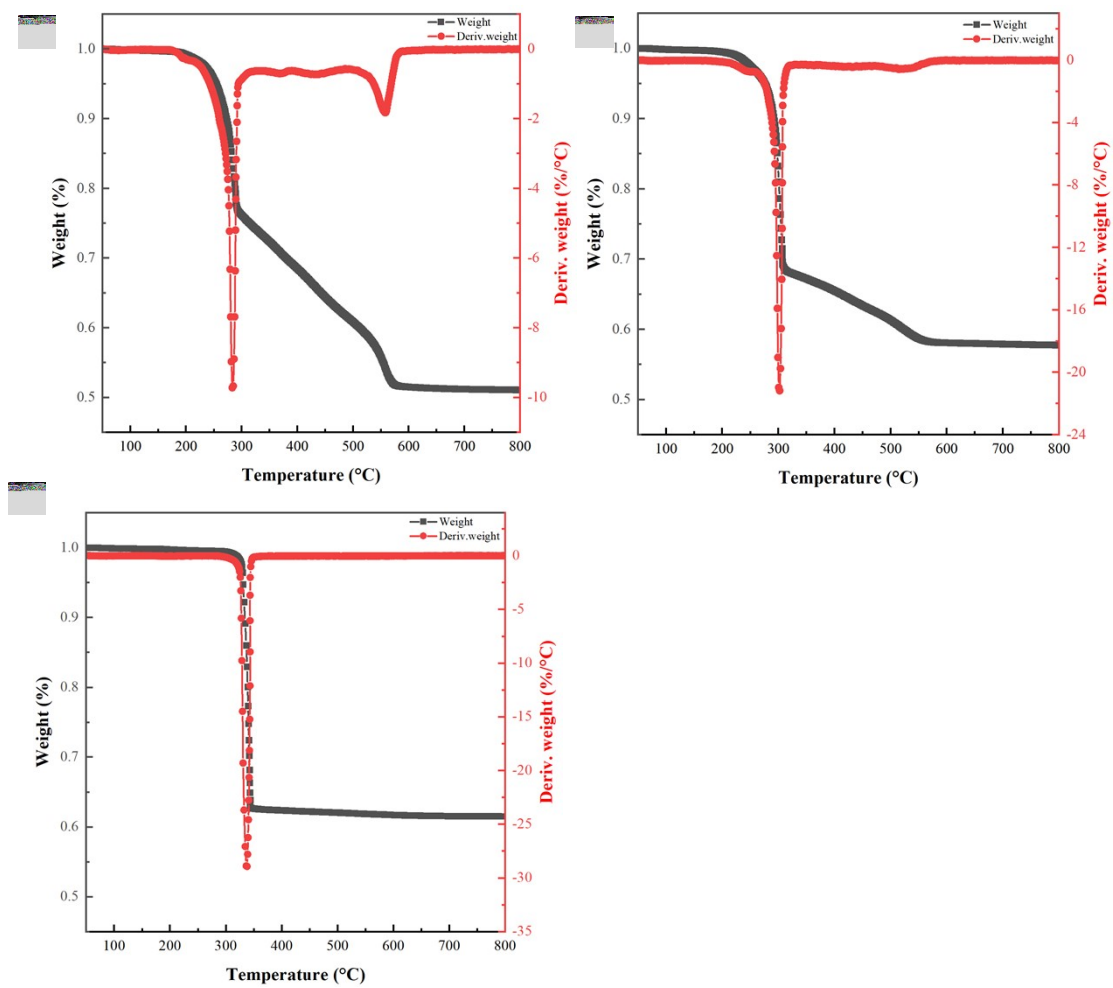

**Fig. S5 TGA (black curves) and DTG (red curves) profiles of (a) Zr/Ce(2:1)-MOF-808, (b) Zr/Ce(1:2)-MOF-808, (b) Ce(III)-MOF-808.**

**Table S1 Synthesis a series of Zr/Ce-MOF-808s**

| Catalyst           | ZrCl <sub>2</sub> O·8H <sub>2</sub> O |        | CeCl <sub>3</sub> ·7H <sub>2</sub> O |        | H <sub>3</sub> BTC | DMF    | Formic acid |
|--------------------|---------------------------------------|--------|--------------------------------------|--------|--------------------|--------|-------------|
| MOF-808            | 9 mmol                                | 2.9 g  | 0 mmol                               | 0 g    |                    |        |             |
| Zr/Ce(2:1)-MOF-808 | 6 mmol                                | 1.93 g | 3 mmol                               | 1.12 g | 3 mmol<br>0.63 g   | 150 ml | 150 ml      |
| Zr/Ce(1:1)-MOF-808 | 4.5 mmol                              | 1.45 g | 4.5 mmol                             | 1.68 g |                    |        |             |
| Zr/Ce(1:2)-MOF-808 | 3 mmol                                | 0.97 g | 6 mmol                               | 2.24 g |                    |        |             |
| Ce(III)-MOF-808    | 0 mmol                                | 0 g    | 9 mmol                               | 3.35 g |                    |        |             |

---

**Table S2 Atomic compositions (at.%) from XPS analysis**

| Catalyst           | Atomic% |       |      |       |       |
|--------------------|---------|-------|------|-------|-------|
|                    | Zr 3d   | Ce 3d | N 1s | O 1s  | C 1s  |
| MOF-808            | 8.12    | 0     | 2.37 | 34.87 | 54.65 |
| Zr/Ce(2:1)-MOF-808 | 6.01    | 1.73  | 2.45 | 35.28 | 54.53 |
| Zr/Ce(1:1)-MOF-808 | 3.98    | 3.8   | 1.83 | 35.38 | 55.01 |
| Zr/Ce(1:2)-MOF-808 | 2.79    | 5.15  | 2.3  | 36.04 | 53.72 |
| Ce(III)-MOF-808    | 0       | 4.99  | 0    | 37.28 | 57.73 |

**Table S3 Full width at half maximum (FWHM), peak position and peak area**

| Catalyst           | Name of fitted peaks             | Binding energies (eV) | FWHM (eV) | Peak area (cps·eV) |
|--------------------|----------------------------------|-----------------------|-----------|--------------------|
| MOF-808            | C1s C-C                          | 284.8                 | 1.45      | 168213.67          |
|                    | C1s O-C=O                        | 288.74                | 1.34      | 32572.03           |
|                    | C1s C-O                          | 286.6                 | 1.42      | 11376.89           |
|                    | O1s COOMe                        | 531.63                | 1.81      | 269362.79          |
|                    | O1s metal oxide                  | 530.06                | 1.53      | 99910.77           |
|                    | Zr3d5                            | 182.56                | 1.43      | 193120.18          |
|                    | Zr3d3                            | 184.94                | 1.43      | 132914.85          |
| Zr/Ce(2:1)-MOF-808 | C1s C-C                          | 284.8                 | 1.4       | 157455.52          |
|                    | C1s C-O                          | 286.65                | 1.38      | 11669.08           |
|                    | C1s O-C=O                        | 288.77                | 1.37      | 32635.51           |
|                    | Ce3d3 u                          | 898                   | 3.49      | 13063.92           |
|                    | Ce3d3 U                          | 900.56                | 2.17      | 46752.43           |
|                    | Ce3d3 u'                         | 903.47                | 3.67      | 27126.44           |
|                    | Ce3d3 U'                         | 907.37                | 1.88      | 8167.19            |
|                    | Ce3d3 U''                        | 916.31                | 1.88      | 29702.59           |
|                    | Ce3d5 v                          | 880.4                 | 3.49      | 18866.17           |
|                    | Ce3d5 V                          | 882.11                | 2.17      | 67519.84           |
|                    | Ce3d5 v'                         | 885                   | 3.67      | 39176.42           |
|                    | Ce3d5 V'                         | 888.47                | 1.88      | 11794.48           |
|                    | Ce3d5 V''                        | 897.94                | 1.88      | 42894.36           |
|                    | O1s electron-rich hydroxyl group | 529.18                | 1.06      | 28210.69           |
|                    | O1s COOMe                        | 531.72                | 1.7       | 217979.62          |
|                    | O1s metal oxide                  | 530.24                | 1.98      | 95256.59           |
|                    | Zr3d3                            | 185.06                | 1.4       | 92805.02           |
| Zr3d5              | 182.68                           | 1.4                   | 134842.14 |                    |
| Zr/Ce(1:1)-MOF-808 | C1s C-C                          | 284.8                 | 1.43      | 134970.08          |
|                    | C1s C-O                          | 286.74                | 1.28      | 4455.63            |
|                    | C1s O-C=O                        | 288.79                | 1.48      | 25234.69           |
|                    | Ce3d3 u                          | 898                   | 2.48      | 17988.26           |
|                    | Ce3d3 U                          | 900.53                | 1.94      | 70689.15           |
|                    | Ce3d3 u'                         | 903.14                | 3.9       | 74041.15           |
|                    | Ce3d3 U'                         | 907.37                | 1.88      | 14190.4            |
|                    | Ce3d3 U''                        | 916.27                | 1.92      | 54247.25           |
|                    | Ce3d5 v                          | 880.4                 | 2.48      | 25977.37           |
|                    | Ce3d5 V                          | 882.11                | 1.94      | 102086.04          |
|                    | Ce3d5 v'                         | 884.64                | 3.9       | 106928.8           |
|                    | Ce3d5 V'                         | 888.47                | 1.88      | 20492.76           |
|                    | Ce3d5 V''                        | 897.94                | 1.92      | 78865.85           |
|                    | O1s electron-rich                | 529.19                | 1.1       | 73682.56           |

|                    |                   |        |      |           |
|--------------------|-------------------|--------|------|-----------|
|                    | hydroxyl group    |        |      |           |
|                    | O1s COOMe         | 531.73 | 1.76 | 159383.21 |
|                    | O1s metal oxide   | 530.49 | 1.97 | 60737.07  |
|                    | Zr3d3             | 185.12 | 1.4  | 52034.29  |
|                    | Zr3d5             | 182.73 | 1.4  | 75603.82  |
|                    | C1s C-C           | 284.8  | 1.42 | 132447.77 |
|                    | C1s C-O           | 286.76 | 1.43 | 6890.5    |
|                    | C1s O-C=O         | 288.75 | 1.54 | 24459.59  |
|                    | Ce3d3 u           | 898    | 5.44 | 67829.84  |
|                    | Ce3d3 U           | 900.58 | 1.85 | 82863.59  |
|                    | Ce3d3 u'          | 903.48 | 2.57 | 70725.23  |
|                    | Ce3d3 U'          | 907.13 | 1.89 | 33892.17  |
|                    | Ce3d3 U''         | 916.32 | 1.87 | 73148.69  |
|                    | Ce3d5 v           | 880.4  | 5.44 | 98275.84  |
| Zr/Ce(1:2)-MOF-808 | Ce3d5 V           | 882.11 | 1.85 | 119665.69 |
|                    | Ce3d5 v'          | 885.1  | 2.57 | 102133.42 |
|                    | Ce3d5 V'          | 888.47 | 1.89 | 48944.5   |
|                    | Ce3d5 V''         | 897.94 | 1.87 | 105636.13 |
|                    | O1s electron-rich | 529.16 | 1.06 | 88066.49  |
|                    | hydroxyl group    |        |      |           |
|                    | O1s COOMe         | 531.69 | 1.65 | 105253.54 |
|                    | O1s metal oxide   | 530.65 | 2.71 | 111916.24 |
|                    | Zr3d3             | 185.12 | 1.46 | 36906.82  |
|                    | Zr3d5             | 182.73 | 1.46 | 53624.2   |
|                    | C1s C-C           | 284.8  | 1.49 | 96543.01  |
|                    | C1s C-O           | 286.64 | 1.89 | 6430.87   |
|                    | C1s O-C=O         | 288.68 | 1.38 | 60194.67  |
|                    | Ce3d3 u           | 900.27 | 3.97 | 136626.23 |
|                    | Ce3d3 u'          | 904.39 | 3.35 | 169019.26 |
|                    | Ce3d5 v           | 882.11 | 3.97 | 197903.83 |
|                    | Ce3d5 v'          | 885.93 | 3.35 | 244490.13 |
| Ce(III)-MOF-808    | O1s COOMe         | 531.82 | 1.59 | 307331.64 |
